# Supplementary material for: First-principles simulation of monolayer hydrogen passivated Bi2O2S2–metal interfaces
Source: Royal Society of Chemistry journal article supplement (doi:10.1039/d0cp00058b), 2020-01-01
Supplement: d0cp00058b1.pdf [file d0cp00058b1.pdf]

**Supporting Information**  
**First-Principles Simulation of Monolayer Hydrogen Passivated**  
**Bi<sub>2</sub>O<sub>2</sub>S<sub>2</sub>-Metal Interfaces**

Linqiang Xu,<sup>1,†</sup> Shiqi Liu,<sup>1,†</sup> Han Zhang,<sup>1</sup> Xiuying Zhang,<sup>1</sup> Jingzhen Li,<sup>1</sup> Jiahuan Yan,<sup>1</sup>  
Bowen Shi,<sup>1</sup> Jie Yang,<sup>1</sup> Chen Yang,<sup>1,2</sup> Lianqiang Xu,<sup>4</sup> Xiaotian Sun,<sup>5</sup> Jing Lu<sup>1,3,6\*</sup>

<sup>1</sup>State Key Laboratory of Mesoscopic Physics and Department of Physics, Peking  
University, Beijing 100871, P. R. China

<sup>2</sup>Academy for Advanced Interdisciplinary Studies, Peking University, Beijing 100871, P. R.  
China

<sup>3</sup>Collaborative Innovation Center of Quantum Matter, Beijing 100871, P. R. China

<sup>4</sup>School of Physics and Electronic Information Engineering, Engineering Research  
Center of Nanostructure and Functional Materials, Ningxia Normal University, Guyuan,  
Ningxia 756000, P. R. China

<sup>5</sup>College of Chemistry and Chemical Engineering, and Henan Key Laboratory of  
Function- Oriented Porous Materials, Luoyang Normal University, Luoyang 471934, P. R.  
China

<sup>6</sup>Beijing Key Laboratory for Magnetoelectric Materials and Devices (BKL-MEMD), Beijing  
100871, P. R. China

† These authors contributed equally to this work.

Email: [jinglu@pku.edu.cn](mailto:jinglu@pku.edu.cn)

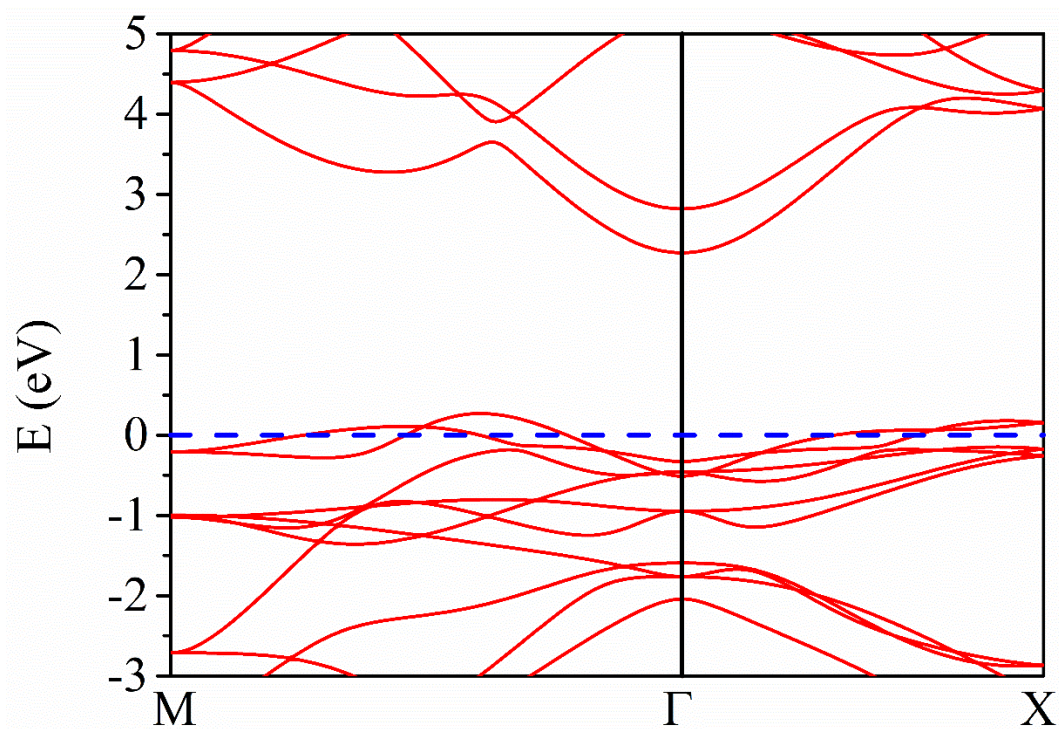

**Figure S1.** Band structure of ML  $\text{Bi}_2\text{O}_2\text{S}_2$  without hydrogen passivation.

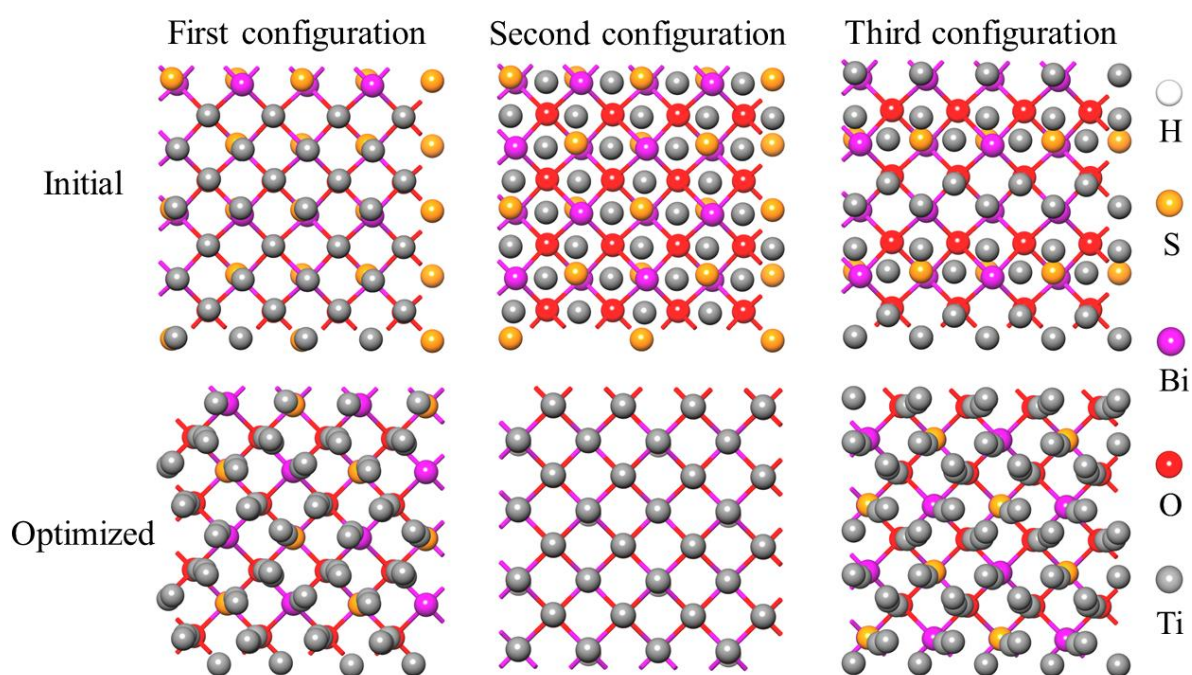

**Figure S2.** Three kinds of interfacial stacking configurations for Ti electrode. The first line displays the three initial configurations. The second line displays the three configurations after optimization. The corresponding atoms are shown on the right.

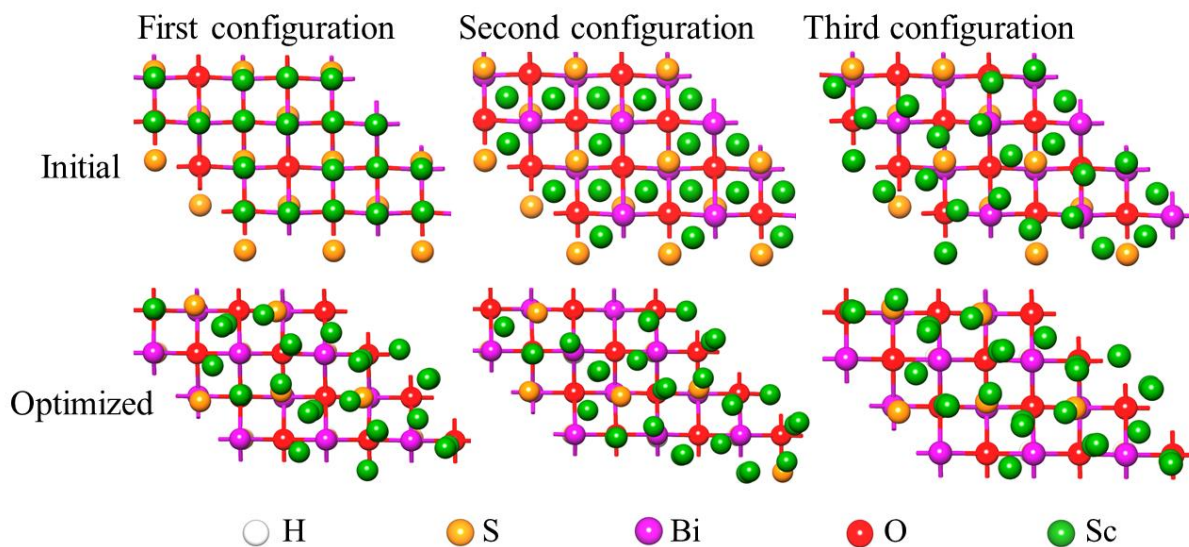

**Figure S3.** Three kinds of interfacial stacking configurations for Sc electrode. The first line displays the three initial configurations. The second line displays the three configurations after optimization. The corresponding atoms are shown on the bottom.

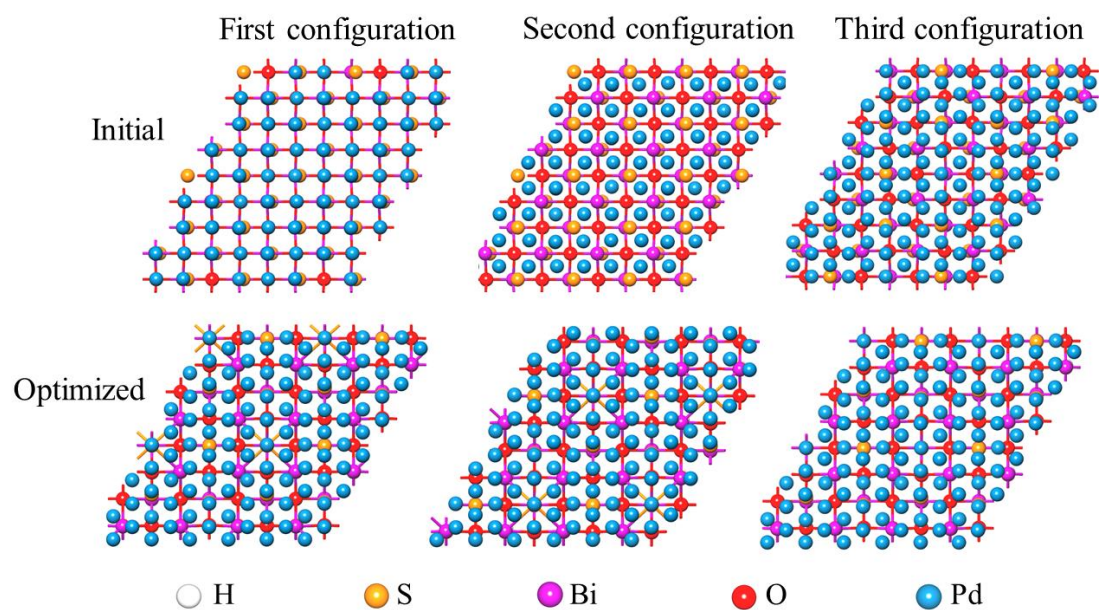

**Figure S4.** Three kinds of interfacial stacking configurations for Pd electrode. The first line displays the three initial configurations. The second line displays the three configurations after optimization. The corresponding atoms are shown on the bottom.



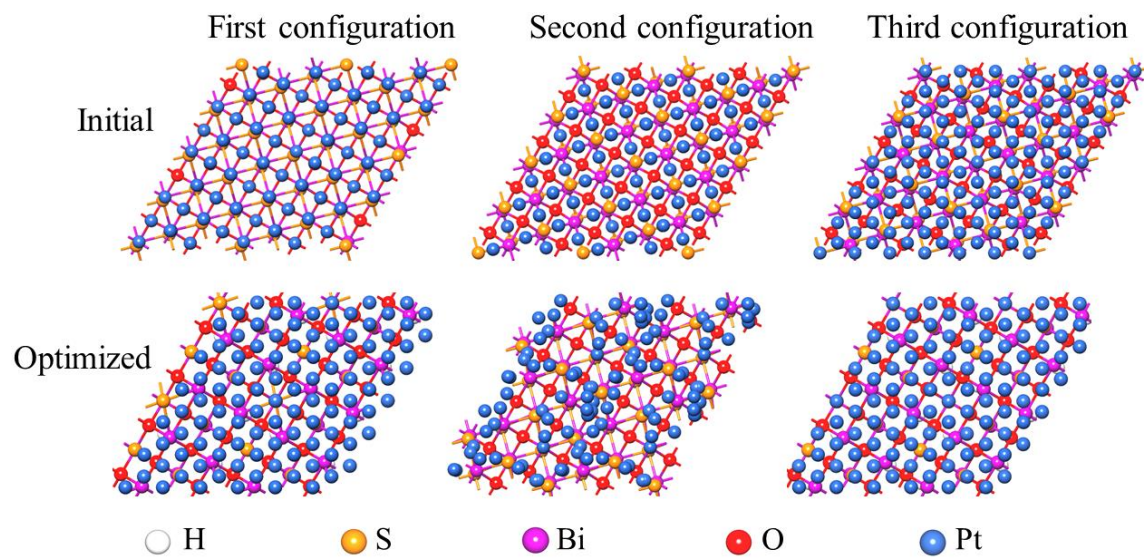

**Figure S5.** Three kinds of interfacial stacking configurations for Pt electrode. The first line displays the three initial configurations. The second line displays the three configurations after optimization. The corresponding atoms are shown on the bottom.
